1 **Title: Maximizing the reliability and the number of species assignments in metabarcoding studies**

2

3 Running title: Maximizing reliability in species assignments

4

5 Authors :

6 Audrey Bourret<sup>a,1\*</sup>, Claude Nozères<sup>b</sup>, Eric Parent<sup>a</sup>, Geneviève J. Parent<sup>a</sup>

7

8 a Laboratory of genomics, Maurice Lamontagne Institute, Fisheries and Oceans Canada, Mont-Joli, QC,  
9 G5H 3Z4, Canada

10 b Maurice Lamontagne Institute, Fisheries and Oceans Canada, Mont-Joli, QC, G5H 3Z4, Canada

11

12 Email addresses:

13 1. [audrey.bourret@dfo-mpo.gc.ca](mailto:audrey.bourret@dfo-mpo.gc.ca)\*

14 2. [claudenozeres@dfo-mpo.gc.ca](mailto:claudenozeres@dfo-mpo.gc.ca)

15 3. [eric.parent@dfo-mpo.gc.ca](mailto:eric.parent@dfo-mpo.gc.ca)

16 4. [genevieve.parent@dfo-mpo.gc.ca](mailto:genevieve.parent@dfo-mpo.gc.ca)

17

18 \*Correspondence author

19

20 Abstract

21 The use of environmental DNA (eDNA) for biodiversity assessments has increased rapidly over the last  
22 decade. However, the reliability of taxonomic assignments in metabarcoding studies is variable, and  
23 affected by the reference databases and the assignment methods used. Species level assignments are  
24 usually considered as reliable using regional libraries but unreliable using public repositories. In this  
25 study, we aimed to test this assumption for metazoan species detected in the Gulf of St. Lawrence, in the  
26 Northwest Atlantic. We first created a regional library with COI barcode sequences including a reliability  
27 ranking system for species assignments. We then estimated the accuracy of the public repository NCBI-nt  
28 for species assignments using sequences from the regional library, and contrasted assigned species and  
29 their reliability using NCBI-nt or the regional library with a metabarcoding dataset and popular  
30 assignment methods. With NCBI-nt and sequences from the regional library, Blast-LCA was the most  
31 accurate method for species assignments but the proportions of accurate species assignments were  
32 higher with Blast-TopHit (>80 % overall taxa, between 70 and 90 % amongst taxonomic groups). With the  
33 metabarcoding dataset, the reliability of species assignments was greater using the GSL-rl compared to  
34 NCBI-nt. However, we also observed that the total number of reliable species assignments could be  
35 maximized using both GSL-rl and NCBI-nt, and their optimal assignment methods, which differed. The  
36 use of a two-step approach in species assignments, using a regional library and a public repository, could  
37 improve the reliability and the number of detected species in metabarcoding studies.

38 **Keywords:** Genbank, reference library, COI, marine species

39

## 40 Introduction

41 The use of environmental DNA (eDNA) for biodiversity assessments and monitoring has increased rapidly  
42 over the last decade given the high potential of this non-intrusive approach to uncover biodiversity with  
43 limited effort (Taberlet et al. 2012, Makiola et al. 2020). eDNA metabarcoding surveys collect and detect  
44 traces of a diversity of organisms in various types of environmental samples using high-throughput  
45 sequencing or PCR-based approaches (Taberlet et al. 2012, Yu et al. 2012). Surveys of eDNA generally  
46 involve a series of steps such as sample collection, extraction, targeted amplification, high-throughput  
47 sequencing, and bioinformatic processing, which includes taxonomic assignments to reference  
48 sequences from a public repository or a regional library (Deiner et al. 2017). Only a small fraction of  
49 detected eDNA sequences in environmental samples can currently be assigned to a species-level identity  
50 owing to a lack of data and taxonomic resolution in publicly available resources (Deiner et al. 2017, Leite  
51 et al. 2021, Zafeiropoulos et al. 2021). The reliability and precision of taxonomic assignments is affected  
52 by the quality and availability of sequences in repositories and the assignment methods, thereby limiting  
53 confidence in the use of eDNA for biodiversity monitoring and targeted species detections (Coissac et al.  
54 2012, McGee et al. 2019, Meiklejohn et al. 2019, Gold et al. 2021, Hleap et al. 2021).

55 Several public repositories exist and can be used as reference databases to provide taxonomic  
56 assignments in metabarcoding studies. The public National Center for Biotechnology Information  
57 Nucleotide database (NCBI-nt, including the well-known GenBank database) is the largest sequence  
58 repository and is widely used in eDNA metabarcoding studies (Porter and Hajibabaei 2018b, 2020).  
59 However, the presence of mislabeled specimens, the large variation in quality of sequences available,  
60 and gaps in species coverage (i.e., unrepresented species) result in erroneous species identification when  
61 directly comparing unknown sequences to NCBI-nt (Bidartondo 2008, Mioduchowska et al. 2018, Leray et

62 al. 2019). The Barcode of Life Data Systems (BOLD) is another sequence repository specific to the most  
63 common barcode regions, including the cytochrome c oxidase I (COI) gene which is the widely used gene  
64 region for animal DNA barcoding (Ratnasingham and Hebert 2007, Porter and Hajibabaei 2018b). BOLD  
65 displays mandatory (e.g., institution storing voucher specimen, sampling country) and optional (e.g.,  
66 sampling location, specimen photos) metadata, performs groupings of similar sequences into Barcode  
67 Index Number (BIN), and permits editing or updating of records, all of which assists with data quality  
68 control. However, like GenBank, it is also vulnerable to submissions of misidentified specimens  
69 (McCusker et al. 2013, Oliveira et al. 2016, Fontes et al. 2021, Radulovici et al. 2021). As reliable  
70 taxonomic assignments at the species-level are expected under many regulatory contexts (e.g.,  
71 environmental status assessment, monitoring of invasive species or species at risks; Aylagas et al. 2014,  
72 Hering et al. 2018, Bush et al. 2019, Piper et al. 2019), some metabarcoding studies have questioned the  
73 value of using public repositories (e.g., von Ammon et al. 2018, Locatelli et al. 2020, Gold et al. 2021).  
74 Characterizing the proportion of accurate species assignments using NCBI-nt would be highly valuable to  
75 understand the extent of uncertainty in species eDNA detection and consequently, enable an accurate  
76 interpretation of a metabarcoding study's results.

77 Alternatively, curated regional libraries have been shown to reduce errors in species assignments (Gold  
78 et al. 2021). Regional libraries are limited to species expected in predefined areas, and can be created by  
79 data mining and curating existing sequences from public repositories and/or from generating sequences  
80 from specimens. They have the advantage to limit spurious assignments to related but non-local species,  
81 and to reveal gaps (i.e., missing sequences) in taxonomic groups (Weigand et al. 2019, Ramirez et al.  
82 2020, Jazdzewska et al. 2021). Examples of regional libraries are widely available in the northern  
83 hemisphere for multiple taxonomic groups (e.g., Knebelsberger et al. 2014, Hänfling et al. 2016, Stoeckle

84 et al. 2017, Fraija-Fernández et al. 2020, Gold et al. 2021, Van Den Bulcke et al. 2021). Some of these  
85 reference libraries present ranking systems to ensure high taxonomic reliability (e.g., Costa et al. 2012,  
86 Knebelsberger et al. 2014). Ranking systems are often provided to target future barcoding efforts and  
87 improvements in reference sequences. No explicit ranking system about the uncertainty of species  
88 assignment has yet been presented within metabarcoding studies. Such a system would be highly  
89 valuable to provide clear indications on the reliability of species assignments for eDNA end-users.

90 Another source of variability in species assignments are the bioinformatics software and pipelines used  
91 in metabarcoding studies. Recently, studies have started to evaluate the accuracy of taxonomic  
92 assignments using various bioinformatic methods (O'Rourke et al. 2020, Hleap et al. 2021, Mathon et al.  
93 2021). These studies compared taxonomic assignment methods that are based on strategies such as  
94 alignment, composition, or modelling (Richardson et al. 2017, see also four strategies in Hleap et al.  
95 2021). The Basic Local Alignment Search Tool (BLAST) is an alignment-based approach extensively used in  
96 metabarcoding studies that relies on a nearest-neighbor approach to return best hits between unknown  
97 sequences and records from a reference database (Camacho et al. 2009). The taxonomic identity of the  
98 unknown sequence may be inferred in conjunction with a least common ancestor (LCA) or a Top Hit  
99 approach with identity threshold, usually between 95 and 99%. These thresholds should reflect expected  
100 inter-species divergence, but high variation among taxonomic groups may cause pitfalls in assignments  
101 (Wang et al. 2007, Alberdi et al. 2018). Classifiers using machine-learning algorithms are from  
102 composition-based approaches that have shown good performance in some contexts of species  
103 assignments (Richardson et al. 2017, Murali et al. 2018, Porter and Hajibabaei 2018a). They can take  
104 advantage of phylogeny between reference sequences and thus are less affected by shared divergence  
105 between groups. Classifiers are trained on a reference library, and pre-trained classifiers are increasingly

106 available (e.g., Porter and Hajibabaei 2018a). However, recent benchmarking studies have shown lower  
107 performance of classifiers compared to BLAST (O'Rourke et al. 2020, Hleap et al. 2021, Mathon et al.  
108 2021).

109 This study aimed to estimate the accuracy of species assignments using NCBI-nt and to contrast the  
110 reliability of using NCBI-nt or a regional library on a metabarcoding dataset with popular assignment  
111 methods (Fig. 1). To achieve these objectives, we first created a curated regional library (GSL-rl) using  
112 publicly available sequences from BOLD for COI barcode locus of metazoans from the Gulf of St.  
113 Lawrence. The regional library presents a reliability ranking system for species assignments based on  
114 sequence availability and similarity that can be understood by any eDNA end-users, scientists or not. We  
115 then used sequences from GSL-rl to estimate the accuracy of NCBI-nt. We also compared the assigned  
116 species in a metabarcoding dataset using NCBI-nt or GSL-rl and their reliability. We reached the  
117 conclusion that using a two-step approach, i.e., species assignments with a regional library and a public  
118 repository, is desirable to maximize the reliability and the number of species assignments in  
119 metabarcoding studies.

120

## 121 Methods

122 Creation of a regional library for the Gulf of St. Lawrence (GSL-rl) with a reliability ranking system

123 The creation of a curated regional library for the Gulf of St. Lawrence was composed of three major

124 steps: 1) obtaining a list of marine faunal species from both decision-makers and available regional

125 taxonomical information (Nozères 2017), 2) creating an initial regional library using bioinformatics tools

126 with BOLD and rounds of revisions based on quality and similarity of sequences, and 3) enhancing the

127 draft regional library using a metabarcoding dataset (hereafter GSL regional library: GSL-rl; Fig. S1). All

128 sequences retained in the GSL-rl had names at the genus or species level and were already published on

129 BOLD. More details about the creation of the GSL-rl are provided in the supplementary material.

130 We created the GSL-rl to identify molecular operational taxonomic units (MOTUs) at the species level.

131 Each species in the GSL-rl was ranked based on sequence availability and similarity (Table S1). Species

132 with reference sequences for itself and closely related species (i.e., from the same genus) acknowledged

133 to be present in the Gulf of St. Lawrence were ranked as “Reliable” if they did not share BOLD’s barcode

134 index number (BIN; i.e., a unique identifier of sequences based on genetic distance, Ratnasingham and

135 Hebert 2013). Species with reference sequences for itself, but not for all congeners acknowledged to be

136 present in the Gulf of St. Lawrence (i.e., other species of the same genus) were ranked as “Unreliable due

137 to gaps”. Species with reference sequences sharing BIN with other species were ranked as “Unreliable

138 due to BIN sharing”. Common causes of BIN sharing are genetic similarities between species or specimen

139 misidentification. For the GSL-rl, curation and validation process done during its creation should limit the

140 BIN sharing due to specimen misidentification. Taxonomic assignments belonging to one of the two

141 “Unreliable” categories should be interpreted with caution, and preferably not at the species-level.

142 Evaluating the accuracy of species assignments using the public NCBI-nt repository

143 We used the curated sequences from the GSL-rl to estimate three performance parameters using NCBI-  
144 nt: 1) the proportion of assignments, 2) the proportion of accurate assignments, and 3) the accuracy.

145 Taxonomic assignments were performed using NCBI-nt (downloaded 2020-10-23) and the BlastX tool  
146 *blastn* (v2.10.1, Camacho et al. 2009) combined with the least common ancestor (LCA; hereafter Blast-  
147 LCA) or the Top Hit methods (hereafter, Blast-TopHit) at three identity thresholds (95, 97 and 99%) from  
148 an in-house R script. The LCA method assigns the higher taxonomic rank shared by all hits above the  
149 identity threshold while the Top Hit method only used the hits with the highest probability. We excluded  
150 hits containing “environmental sample”, “uncultured” or “predicted” in their description.

151 We assessed the proportion of assignments at the species level, and we considered that an assignment  
152 was accurate if it matched the species identity associated in the GSL-rl. We measured accuracy as the  
153 proportion of accurate assignments over all assignments at the species level.

154 Contrasting species assignments using the regional library or the public NCBI-nt repository, and  
155 popular assignment methods

156 We compared the detection results from an eDNA metabarcoding dataset using GSL-rl and NCBI-nt and  
157 three assignment methods (Fig. 1). The eDNA metabarcoding dataset was obtained from the analysis of  
158 water samples collected from scientific surveys in 2018 in coastal areas of the GSL, both at the surface  
159 and bottom of the water column (see supplementary material for details on the field, laboratory and  
160 bioinformatics works underlying the eDNA metabarcoding dataset). The three assignment methods were  
161 Blast-LCA, Blast-TopHit and the IDtaxa (Murali et al. 2018). Blast assignment methods were used as



162 described in the previous section with both GSL-rl and NCBI-nt. NCBI-nt Blast results were filtered to  
163 retain only metazoan detections and remove non-marine taxa (i.e., *Homo sapiens*, Arachnida, Insecta).  
164 IDtaxa is a classifier implemented within the DECIPHER R package (Wright 2016), and was trained only  
165 with the GSL-rl. IDtaxa classifier was selected since it would be less prone to “over classification”, i.e.,  
166 classification to an erroneous group when the real group is absent from the training set, compared to the  
167 popular Ribosomal Database Project (RDP) classifier (Murali et al. 2018). Taxonomic assignments with  
168 IDtaxa were obtained at three confidence thresholds (i.e., weighted fraction of bootstrap replicates  
169 assigned to a given taxa) representing moderate confidence (40%), high confidence (50%), and very high  
170 confidence (60%) in species assignments (Murali et al. 2018).

171 We contrasted results obtained using GSL-rl and NCBI-nt with distinct ranking systems. Species detected  
172 with the GSL-rl were classified according to the three categories of the reliability ranking system  
173 previously created: “Reliable”, “Unreliable due to gaps”, “Unreliable due to BIN sharing” (Fig. 1B,  
174 Table S2). For species assignments with NCBI-nt, we used geographic and habitat filters to classify them  
175 as “Likely” if they were part of the Gulf of St. Lawrence checklist (Nozères 2017) or present in the areas  
176 based on the World Register of Marine Species (WoRMS, WoRMS Editorial Board 2020), and “Unlikely” if  
177 not (Fig. 1A). Such filters are often applied in metabarcoding studies but the source of information for  
178 the likeliness of a species to be present is often obscure.

179 Data and R scripts availability

180 All data and R scripts used for the creation of the GSL-rl are provided on Github:

181 [https://github.com/GenomicsMLI-DFO/GSL\\_COI\\_ref\\_library](https://github.com/GenomicsMLI-DFO/GSL_COI_ref_library)

182

## 183 Results

184 A COI regional library with a reliability ranking system for metazoans from the Gulf of St.

185 Lawrence (GSL-rl)

186 The first version of the GSL-rl comprised 1304 sequences covering 439 species (158 species of

187 vertebrates from phylum Chordata from 68 families; 281 species of invertebrates from 129 families and 9

188 phyla) and 11 other taxa at the genus level only (Vertebrates: 3 genera from 2 families and phylum

189 Chordata; Invertebrates: 8 genera from 8 families and 4 phyla; Fig 2). It represented 67.4% of the taxa on

190 the target list (651 species) used and improved during the GSL-rl creation (Vertebrates: 94.6%;

191 Invertebrates: 58.1%; Table S1). The sequences were retrieved mostly from the Northwest Atlantic

192 Ocean (67.8%). A total of 525 BINs were represented (Vertebrates: 159; Invertebrates: 366), with 16 BINs

193 that were shared by at least two taxa (Vertebrates: 8; Invertebrates: 8; Table S2), and 58 taxa occupied

194 more than one BIN (6 vertebrates with up to 3 BINs; 52 invertebrates with up to 7 BINs; Table S3).

195 Median sequence length was 658 pb (range: 640 – 664 pb) while the mean ( $\pm$  sd) of missing values (N's)

196 was  $0.002 \pm 0.034$  % (max < 1 %). Genetic distances were on average 0.005 (range: 0.000–0.023) within

197 BIN and 0.122 (range: 0.012–0.347) between intraspecific BINs.

198 We then provided a reliability ranking to each species within the GSL-rl based on the completeness of

199 sequences available (Fig 2, Table S4; see methods for more details). Species within the “Reliable”

200 category accounted for the largest proportion of the species with sequences from the regional library

201 (302 species or 68.8%; 133 vertebrates, 169 invertebrates). Species classified to the “Unreliable due to

202 BIN sharing” and the “Unreliable due to gaps” categories represented 5.2% (23 species; 13 Chordata, 10

203 invertebrates) and 26.0% (114 species; 12 vertebrates, 102 invertebrates) of the GSL-rl species,

204 respectively. The GSL-rl (version 1.0 and future versions) is available on GitHub

205 ([https://github.com/GenomicsMLI-DFO/MLI\\_GSL-rl](https://github.com/GenomicsMLI-DFO/MLI_GSL-rl)).

206 Accuracy of species assignments using NCBI-nt and two assignment methods

207 The proportions of species assignments overall taxa were higher with the Blast-TopHit method (range:

208 85.5% – 87.9%) than the Blast-LCA method (range: 47.6 – 71.0%) with any identity thresholds (Fig 3A).

209 Overall taxa, the proportions of species assignments increased for the Blast-LCA method while they

210 decreased with the Blast-TopHit method with increasing identity thresholds (Fig. 3A). Across taxonomic

211 groups, the proportions of species assignments were also consistently greater at all thresholds for the

212 Blast-TopHit method compared to the Blast-LCA method. The proportions of species assignments at the

213 97% similarity threshold varied with the Blast-TopHit from 74.4% for Annelida, Brachiopoda, Nemertea

214 to 93.1% for Arthropoda method and with the Blast-LCA method from 35.8% for Cnidaria, Porifera to

215 75.2% for Arthropoda (Fig. 3B).

216 The proportions of accurate species assignments were higher with the Blast-TopHit method compared to

217 the Blast-LCA method, overall taxa and in each taxonomic group at all identify thresholds (Fig. 3A, B).

218 Overall taxa, proportions of accurate species assignments varied between 80.1 and 82.5% for Blast-

219 TopHit method and between 42.7 and 68.0% for the Blast-LCA method for the three identity thresholds

220 tested (Fig. 3A). For each taxonomic group, proportions of accurate assignments at the species level were

221 consistently higher at all thresholds with the Blast-TopHit method compared to the Blast-LCA method.

222 The proportions of accurate species assignments at the 97% threshold varied with the Blast-TopHit

223 method from 69.6% for Annelida, Brachiopoda, Nemertea to 89.6% for Arthropoda and with the Blast-

224 LCA method from 34.0% for Cnidaria and Porifera to 73.6% for Arthropoda (Fig. 3B).

225 The accuracy was greater for the Blast-LCA method compared to those of the Blast-TopHit method  
226 overall taxa at all thresholds (Blast-LCA range: 95.7 – 96.9 %, Blast-TopHit range: 93.8 – 94.4%; Fig. 3A),  
227 and in most taxonomic groups at the 97% threshold (Blast-LCA range: 92.3 – 99.2%, Blast-TopHit range:  
228 89.6 – 96.3%; Fig. 3B).

229 Species assignments using GSL-rl and NCBI-nt, three assignment methods, and a metabarcoding  
230 dataset

231 We used an eDNA metabarcoding dataset to compare the number and the reliability of species assigned  
232 using GSL-rl and NCBI-nt, and three assignment methods. The five possible combinations of  
233 repository/library and assignment methods were GSL-rl and NCBI-nt with Blast-LCA (1, 2), GSL-rl and  
234 NCBI-nt with Blast-TopHit (3,4), and GSL-rl with IDtaxa (5; Fig 1). A total of 80 species were assigned with  
235 the five combinations of repository/library and assignment methods (Fig. 4A). Detected species differed  
236 using NCBI-nt and GSL-rl and the three assignment methods (Fig. 4A).

237 Across all combinations, the highest and lowest numbers of species assigned were observed with NCBI-nt  
238 and Blast-TopHit95 (66 species) and Blast-LCA95 (44 species), respectively (Fig. 4B). The number of  
239 assigned species decreased with increasing thresholds for most combinations, except for Blast-LCA with  
240 the NCBI-nt (Fig. 4B). For GSL-rl, proportions of assigned species ranked as “Unreliable due to BIN  
241 sharing” or “Unreliable due to gaps” did not increase or decrease linearly with changing thresholds of  
242 assignment methods (Fig. 4B). For NCBI-nt, decreasing proportions of “Unlikely” species were assigned  
243 with increasing identity thresholds of Blast-LCA or Blast-TopHit (Fig. 4B).

244 The assignment method with the maximum number of assigned species differed between GSL-rl and  
245 NCBI-nt. The maximum number of assigned species was 62 species with the GSL-rl and IDtaxa40 and 66  
246 species with NCBI-nt and TopHit95 (Fig. 4B). Out of the 62 species assigned using the GSL-rl/IDtaxa40  
247 combination, 46 species (74.2%) were ranked as “Reliable”. The remaining assigned species were ranked  
248 as “Unreliable due to BIN sharing” (4 species, 6.5%) or “Unreliable due to gaps” (12 species, 19.4%; Fig.  
249 4B). With the NCBI-nt/TopHit95 combination, 58 (87.9%) and 8 (12.1%) assigned species were ranked as  
250 “Likely” and “Unlikely” present, respectively (Fig. 4B).

251 Large proportions of detected species were exclusively assigned using GSL-rl or NCBI-nt. A total of 30  
252 species (37.5% of all species detected) were assigned only using GSL-rl (12 species) or NCBI-nt (18  
253 species; Fig. 4AC). For the species only assigned with GSL-rl, 7 species were ranked as “Reliable” whereas  
254 1 and 4 species were ranked as “Unreliable due to BIN sharing” and “Unreliable due to gaps”,  
255 respectively (Fig. 4AC). For the species only assigned with NCBI-nt, 10 species were considered likely to  
256 be present in the GSL whereas 8 species were considered unlikely to be present. For the other 50 species  
257 assigned with both GSL-rl and NCBI-nt, 39 species were ranked as “Reliable” with the GSL-rl (78.0%, Fig.  
258 2C). The remaining species assigned belonged to the “Unreliable due to BIN sharing” (3 species, 6.0%) or  
259 the “Unreliable due to gaps” categories (8 species, 16.0%; Fig. 4AC).

260

## 261 Discussion

262 Species assignments using DNA barcoding and metabarcoding are affected by the quality and taxonomic  
263 coverage of reference sequences and assignment methods used. In this study, we first created a regional  
264 library (GSL-rl) for a widely used barcoding gene, COI, that includes a reliability ranking system for species  
265 level assignments. We then estimated the accuracy of species assignments with NCBI-nt and two  
266 assignment methods using the curated sequences from GSL-rl. While Blast-LCA was the most accurate  
267 method when using NCBI-nt, the proportion of accurate species assignments was highest with Blast-  
268 TopHit (>80 % overall, between 70 and 90% amongst taxonomic groups). We also compared the number  
269 and reliability of species assignments using GSL-rl or NCBI-nt and popular assignment methods with a  
270 metabarcoding dataset. The reliability of species assignments was the greatest using the regional library  
271 but the regional library and the public repository both provided exclusive plausible species detections,  
272 highlighting the importance to use both resources as reference databases. Consequently, we also discuss  
273 a two-step approach, using first a regional library followed by a public library, to maximize the reliability  
274 of species assignments and the number of species detected in metabarcoding studies.

275 A COI regional library with a reliability ranking system for metazoans from the Gulf of St.  
276 Lawrence (GSL-rl)

277 The GSL-rl, a curated regional library, provides explicit reliability ranking for 651 species observed within  
278 the Gulf of St. Lawrence. We used two simple broad categories, namely “Reliable” and “Unreliable”, to  
279 characterize the robustness of species assignments in eDNA metabarcoding studies. This simple ranking  
280 system should limit inaccuracies in the interpretation of species assignments for anyone, even with  
281 limited scientific background. Past studies have shown the importance of a ranking system to limit

282 erroneous species assignments (e.g., Costa et al. 2012, Knebelsberger et al. 2014). However, the ranking  
283 systems used in these studies are targeting an audience of barcoding specialists. With the ranking system  
284 of species assignments in GSL-rl, we aimed to keep this classification simple to reach the large audience  
285 of eDNA users. Still, we used two “Unreliable” subcategories to highlight 1) the taxa necessitating future  
286 barcoding efforts, and 2) the relevancy of the COI barcode to discriminate species. This allows any eDNA  
287 scientist to discard the COI loci if species of interest are not discriminated.

288 The reliability ranking of species in GSL-rl may change over time, particularly for understudied species.  
289 The reliability ranking is based on recent information of regional species distributions and intra- and  
290 inter-genetic diversity. In the future, species may be upgraded to the “Reliable” category when further  
291 sequencing results to fill in data gaps. Some species may also be downgraded to the “Unreliable”  
292 category, particularly for complex taxonomic groups in the region that should be targeted for review  
293 (e.g., polychaete worms). For these reasons, continuous review, curation, and versioning of any regional  
294 libraries are important to track changes in reliability ranking through times. A biennial review is planned  
295 for the GSL-rl given the large amount of effort required for such work.

296 The GSL-rl covers vertebrates and invertebrate species of interest for conservation in the Gulf of St.  
297 Lawrence. The GSL-rl contains reference sequences for 439 species of the 651 targeted species in this  
298 study (i.e., 67.4%), with reference sequences available for a relatively large proportion of invertebrates  
299 (i.e., 59.1%). In Europe, marine invertebrates represented the taxonomic group with the lowest barcode  
300 coverage, where only 22.1% had one or more sequences (Weigand et al. 2019). The larger proportion of  
301 invertebrates with reference sequences in the GSL-rl is likely due to the species selection to initiate this  
302 regional library but also to the smaller study area and the barcoding campaigns for invertebrates in the  
303 Northwest Atlantic (e.g., Radulovici et al. 2009, Layton et al. 2016).

304 The “Reliable” category represented the vast majority of species with reference sequences (68.8%, 302  
305 species) in GSL-rl. Similar results were obtained for marine fish species from Portugal at the COI locus  
306 (73.5%, grade A, Costa et al. 2012). About a quarter of the GSL-rl species was ranked as “Unreliable due  
307 to gaps” due to missing reference sequences from a relative species. For example, the common shelf  
308 species of purple sunstar *Solaster endeca* was only ranked as “Unreliable due to gaps” because no  
309 reference sequence was available for the local but rare, deep water congener species, *Solaster earlIIi*.  
310 Generally, taxonomic groups for which fewer sequences were recovered in the GSL-rl were also those  
311 with more recognized gaps (e.g., Mollusca, Arthropoda). Furthermore, the GSL-rl is in its early  
312 development (v.1.0) and presently covers only a quarter of the estimated 2200 marine faunal species  
313 that may occur in the Gulf of St. Lawrence (Nozères 2017). Some groups were more underrepresented  
314 than others in GSL-rl, e.g., only 10% of the 250 described amphipods. Our study summarizes and lists  
315 where future barcoding efforts should be done to fill gaps in the Gulf of St. Lawrence and the Northwest  
316 Atlantic.

317 The GSL-rl could also improve species assignments in eDNA metabarcoding studies of the Northwest  
318 Atlantic and the Arctic Oceans compared to large public databases. The Gulf of St. Lawrence is a  
319 transitional marine region where temperate southern species may occur alongside boreal and arctic  
320 species (Bourdages et al. 2022). There are no regional libraries covering marine metazoan species at the  
321 COI locus in nearby regions, and the GSL-rl could seed the creation of these regional libraries. These can  
322 be created by data mining and curating existing sequences from public repositories (e.g., the approach  
323 used in this study), completely de novo from barcoding local specimens (e.g., Delrieu-Trottin et al. 2019),  
324 or from a combination of both approaches (e.g., Stoeckle et al. 2020, Gold et al. 2021). New tools are  
325 now emerging to facilitate the creation of regional reference libraries (e.g., Meta-Fish-lib, Collins et al.



326 2021; Barcode, Audit & Grade System (BAGS), Fontes et al. 2021). Some of the tools, such as BAGS, even  
327 allow for the annotation of species based on concordance between morphological species-based  
328 identification and sequence clusters in BOLD (Fontes et al. 2021). Combined with tools to find gaps in  
329 reference sequence libraries (e.g., GAPeDNA, Marques et al. 2021), more comprehensive species-level  
330 assignments are now possible.

331 Accuracy of species assignments using NCBI-nt and two assignment methods

332 We estimated three performance parameters for metazoan species assignment using NCBI-nt. We  
333 observed large variation in those parameters with the two assignment methods tested. While the Blast-  
334 LCA method provided overall higher accuracy in species assignments, the proportion of accurate species  
335 assignments was greater with Blast-TopHit due to the large difference in the proportion of species  
336 assigned, accurate or not. This might be explained by the sensitivity of both methods to the prevalence  
337 of BIN sharing, gaps, and mislabeling within public repositories. For instance, Blast-LCA method is  
338 expected to be less precise and cause under-classification (i.e., assignments at a higher taxonomic level)  
339 in the presence of closely related species and BIN sharing, lowering the proportion of assignments at the  
340 species level. In contrast, Blast-TopHit is expected to favor assignments at the species level and is more  
341 impacted by gaps and mislabeled sequences (e.g., Schenekar et al. 2020), lowering the accuracy of  
342 species assignments. The relatively good performance of Blast-TopHit observed here suggests that gaps  
343 and misidentified specimens within NCBI-nt are limited for the targeted marine species of the Gulf of St.  
344 Lawrence.

345 Previous studies have shown that assignment methods can affect taxa detected in metabarcoding  
346 studies (O'Rourke et al. 2020, Hleap et al. 2021). Our results confirmed those from Hleap and colleagues

347 (2021) that the Blast-TopHit method outperformed the Blast-LCA method with NCBI-nt to provide higher  
348 proportion of assignments. Our results also show that the proportion of accurate species assignments  
349 varied largely between taxonomic groups. Relatively well-described marine taxonomic groups such as  
350 Arthropoda (i.e., crustaceans) and Chordata (i.e., fishes and mammals) have reached proportions of  
351 accurate species assignments  $\geq 85\%$  with the Blast-TopHit method. The proportion of accurate species  
352 assignments is much lower for the Blast-LCA approach with the Chordata (43%), probably because this  
353 approach is more sensitive to the presence of close relative species (i.e., BIN sharing) reducing the  
354 potential of species level identification. Other groups such as Annelida, Brachiopoda, Nemertea, and  
355 Mollusca achieved lower proportions of accurate species assignments using both Blast-TopHit and Blast-  
356 LCA methods (maximum 70%).

357 The proportion of accurate species assignments using the sequences from the GSL-rl in our study will be  
358 different at the time of reading this article due to the continuous growth of the public repository NCBI-  
359 nt. The publication of new sequences of low quality or with incorrect species identification can create  
360 unexpected ambiguities in species assignments as public repositories grow (Locatelli et al. 2020,  
361 Radulovici et al. 2021). Without a comprehensive versioning system, changes in the NCBI-nt database  
362 also limit the reproducibility of species assignments as it is difficult to identify and to access a specific  
363 release. Note that starting with Blast v.2.13 launched in March 2022, it is now possible to generate a  
364 metadata file describing the database used (Camacho and Madden 2022), which in an important step  
365 toward higher traceability.

366 Comparing reliability of species assignments using GSL-rl and NCBI-nt, three assignment methods,  
367 and a metabarcoding dataset

368 The method with the maximal number of species assigned in the metabarcoding dataset differed  
369 between GSL-rl and NCBI-nt. The IDtaxa40 assignment method provided the highest number of species  
370 assigned using the GSL-rl. Sequence composition strategies for species assignments such as IDtaxa,  
371 QIIME, and RDP, had contrasting performance results in previous benchmarking studies (O'Rourke et al.  
372 2020, Hleap et al. 2021, Mathon et al. 2021). Our results contrast with those from a previous study  
373 showing that IDtaxa did not perform as well as Blast with mock communities composed of various  
374 freshwater taxonomic groups (Hleap et al. 2021). The contrasting results between the latter and our  
375 studies could be explained by the difference in the confidence threshold used (Hleap et al. 2021).  
376 Parameter tuning while using any approach may be key to choosing an optimal method for a dataset  
377 while more benchmarking studies are undertaken. The relatively better performance of IDtaxa in our  
378 study might also be due to the quality of the regional library used to train the classifier. We know little  
379 about the impact of using training sets of different qualities on taxonomic assignment using classifiers,  
380 and the gains of using regional libraries might be important in this context. With NCBI-nt, the number of  
381 detected species was greater with Blast-TopHit compared to Blast-LCA with the metabarcoding dataset.  
382 Those results are similar as those obtained with the GSL-rl COI sequences and have been discussed in the  
383 previous section.

384 More than a third of the species assigned ( $n = 33$  out of 80) were exclusive to the use of GSL-rl or NCBI-nt  
385 with the metabarcoding dataset. For the GSL-rl, the exclusion of non-indigenous species or mislabeled  
386 sequences increased the number of species assigned, confirming previous studies results improving  
387 species assignments with regional libraries (von Ammon et al. 2018, Gold et al. 2021). The exclusion of

388 non-indigenous species increased the taxonomic resolution with the GSL-rl of the Atlantic bluefin tuna  
389 *Thunnus thynnus*. Underclassification is usually observed when using NCBI-nt as the Atlantic bluefin tuna  
390 presently shares a BIN (BOLD: AAA7352) with other *Thunnus* species that are not expected to be present  
391 in the Gulf of St. Lawrence (Nozères 2017). With NCBI-nt, detections in the “Likely” category comprised  
392 species for which sequences were not included in the GSL-rl because of the stringency of quality filtering  
393 performed (e.g., Iceland scallop *Chlamys islandica*). Other detections in the “Likely” category were  
394 included in the GSL-rl (e.g., the polychaete worm *Terebellides stroemii*) but the inability to detect them  
395 suggests that their intra-specific diversity is not fully covered by the GSL-rl. Finally, a few species assigned  
396 with NCBI-nt were not listed as present in the GSL but after reconsideration are likely to be found in the  
397 target area (e.g., *Pseudocalanus newmani*). With NCBI-nt, we also observed underclassification of the sea  
398 star genus *Leptasterias* due to sequence mislabeling, which is expected to occur (Bidartondo 2008,  
399 Mioduchowska et al. 2018). The underclassification is due to two misidentified sequences, one is for  
400 *Leptasterias littoralis* identified as the sea star *Asterias forbesi* and the other is for *Leptasterias polaris*  
401 identified as the butterfly *Polyommatus fulgens*.

402 Contrasting the ranking category of NCBI-nt and GSL-rl revealed an important gain in reliability with our  
403 annotated regional library (Fig 1). With NCBI-nt, we provided the likeliness of a species to be present in  
404 the Gulf of St. Lawrence due to the availability of a public species list (Nozères 2017). Such information  
405 layer is often difficult to obtain without expert knowledge (Pappalardo et al. 2021). Of all the species  
406 ranked in the “Likely” category using NCBI-nt, around 78% were classified as “Reliable” in the GSL-rl. Our  
407 results showed that the remaining 22% should be interpreted with caution given gaps (16%) or BIN  
408 sharing with close relative species (6%; Fig 4C). Our results suggest that species level assignments of a  
409 metabarcoding dataset using NCBI-nt and a filter based on geographic plausibility can be misleading. This

410 important hidden and overlooked uncertainty could be acceptable for empirical studies but not under  
411 regulatory context where specific species identification can be crucial, such as the identification of  
412 species at risk (Gilbey et al. 2021). Evaluation of false-positives in the detections of endangered or  
413 invasive species should include potential bias caused by gaps in reference libraries (Cristescu and Hebert  
414 2018).

415 Maximizing the reliability and the number of species assignments in eDNA metabarcoding studies  
416 using a regional library and a public repository

417 Our results showed that the use of a regional library increase both the reliability and the number of  
418 species detected with an eDNA metabarcoding dataset. Yet, some species likely present in the Gulf of St.  
419 Lawrence were only detected with NCBI-nt, as discussed in the previous section. This will be a recurrent  
420 problem until reference sequences are available for more marine metazoan species in the Gulf of St.  
421 Lawrence. The growth of GSL-rl will increase the number of species that can be detected using the  
422 regional library but unexpected species, such as new invasive species or species that have recently  
423 expanded their distribution, could remain undetected (Bohmann et al. 2014, Klymus et al. 2017, Piper et  
424 al. 2019, Stoeckle et al. 2020, Gold et al. 2021). Restricting species assignments to GSL-rl and avoiding the  
425 use of NCBI-nt would limit the maximum number of species detected.

426 Combining the strengths of a regional library and public repositories as a two-step approach is  
427 consequently the optimal solution to maximize reliability and the number of species assigned in  
428 metabarcoding studies. Taxonomic assignments should be first performed with a regional library, ideally  
429 including a reliability ranking system as in the GSL-rl, to maximize the confidence in species assignment.  
430 We then strongly advise contrasting species assignment results from a regional library with those using a

431 public repository to increase the number of species detections (see also Piper et al. 2019, and Xiong et al.  
432 2022 for similar recommendations). This would allow the reader to have a qualitative estimation of the  
433 proportion of accurate species assignments. Species assignments relying uniquely on NCBI-nt should also  
434 clearly indicate that their reliability is limited.

435 We also encourage further benchmarking studies for the selection of optimal methods based on a  
436 broader comparison of assignment methods and the development of training sets for machine-learning  
437 methods. We limited the size of this study by selecting assignment methods often used in eDNA  
438 metabarcoding studies that are also performing relatively well in benchmarking assignment studies  
439 (O'Rourke et al. 2020, Hleap et al. 2021). Our results emphasize that future benchmarking studies should  
440 be done independently for regional libraries and public repositories, given the different properties of  
441 these resources, and to maximize the reliability and the number of species assignments.

442

443 Acknowledgements

444 We thank Grégoire Cortial and Jade Larivière for their inputs at the earlier stages of this study. We also  
445 thank Nick Jeffery for helpful comments on a previous version of the manuscript. We thank Yanick  
446 Gendreau and Sandra Velasquez from the Coastal environmental baseline program and Geneviève Faille  
447 and Geneviève Côté from the Banc-des-Américains Marine Protected Area for eDNA sampling and the  
448 initial list of marine faunal species of interest.

449

450 References

- 451 Alberdi A, Aizpurua O, Gilbert MTP, Bohmann K (2018) Scrutinizing key steps for reliable metabarcoding  
452 of environmental samples. *Methods in Ecology and Evolution* 9: 134–147.  
453 <https://doi.org/10.1111/2041-210X.12849>
- 454 von Ammon U, Wood SA, Laroche O, Zaiko A, Tait L, Lavery S, Inglis GJ, Pochon X (2018) Combining  
455 morpho-taxonomy and metabarcoding enhances the detection of non-indigenous marine pests in  
456 biofouling communities. *Scientific Reports* 8: 1–11. <https://doi.org/10.1038/s41598-018-34541-1>
- 457 Aylagas E, Borja Á, Rodríguez-Ezpeleta N (2014) Environmental status assessment using DNA  
458 metabarcoding: Towards a genetics based marine biotic index (gAMBI). *PLoS ONE* 9.  
459 <https://doi.org/10.1371/journal.pone.0090529>
- 460 Bidartondo MI (2008) Preserving Accuracy in GenBank. *Science* 319: 1616.  
461 <https://doi.org/10.1126/science.319.5870.1616a>
- 462 Bohmann K, Evans A, Gilbert MTP, Carvalho GR, Creer S, Knapp M, Yu DW, de Bruyn M (2014)  
463 Environmental DNA for wildlife biology and biodiversity monitoring. *Trends in Ecology & Evolution*  
464 29: 358–367. <https://doi.org/10.1016/J.TREE.2014.04.003>
- 465 Bourdages H, Brassard C, Chamberland J-M, Desgagnés M, Galbraith P, Isabel L, Senay C (2022) DFO Can.  
466 Sci. Advis. Sec. Res. Doc. Preliminary results from the ecosystemic survey in August 2021 in the  
467 Estuary and northern Gulf of St. Lawrence. DFO.
- 468 Van Den Bulcke L, De Backer A, Ampe B, Maes S, Wittoeck J, Waegeman W, Hostens K, Derycke S (2021)  
469 Towards harmonization of DNA metabarcoding for monitoring marine macrobenthos: The effect of  
470 technical replicates and pooled DNA extractions on species detection. *Metabarcoding and*  
471 *Metagenomics* 5: 233–247. <https://doi.org/10.3897/MBMG.5.71107>
- 472 Bush A, Compson ZG, Monk WA, Porter TM, Steeves R, Emilson E, Gagne N, Hajibabaei M, Roy M, Baird  
473 DJ (2019) Studying ecosystems with DNA metabarcoding: Lessons from biomonitoring of aquatic  
474 macroinvertebrates. *Frontiers in Ecology and Evolution* 7: 1–12.  
475 <https://doi.org/10.3389/fevo.2019.00434>
- 476 Camacho C, Coulouris G, Avagyan V, Ma N, Papadopoulos J, Bealer K, Madden TL (2009) BLAST+:  
477 Architecture and applications. *BMC Bioinformatics* 10: 1–9. [https://doi.org/10.1186/1471-2105-10-](https://doi.org/10.1186/1471-2105-10-421)  
478 421
- 479 Camacho C, Madden T. BLAST+ Release Notes. 2013 Mar 12 [Updated 2022 Mar 11]. In: BLAST® Help  
480 [Internet]. Bethesda (MD): National Center for Biotechnology Information (US); 2008-. Available  
481 from: <https://www.ncbi.nlm.nih.gov/books/NBK131777/>
- 482 Coissac E, Riaz T, Puillandre N (2012) Bioinformatic challenges for DNA metabarcoding of plants and  
483 animals. *Molecular Ecology* 21: 1834–1847. <https://doi.org/10.1111/j.1365-294X.2012.05550.x>
- 484 Collins RA, Trauzzi G, Maltby KM, Gibson TI, Ratcliffe FC, Hallam J, Rainbird S, Maclaine J, Henderson PA,



- 485 Sims DW, Mariani S, Genner MJ (2021) Meta-Fish-Lib: A generalised, dynamic DNA reference library  
486 pipeline for metabarcoding of fishes. *Journal of Fish Biology* 99: 1446–1454.  
487 <https://doi.org/10.1111/jfb.14852>
- 488 Costa FO, Landi M, Martins R, Costa MH, Costa ME, Carneiro M, Alves MJ, Steinke D, Carvalho GR (2012)  
489 A ranking system for reference libraries of DNA barcodes: application to marine fish species from  
490 Portugal. *PloS one* 7: 1–9. <https://doi.org/10.1371/journal.pone.0035858>
- 491 Cristescu ME, Hebert PDN (2018) Uses and misuses of environmental DNA in biodiversity science and  
492 conservation. *Rev. Ecol. Evol. Syst* 49: 209–239. <https://doi.org/10.1146/annurev-ecolsys-110617-062306>
- 494 Deiner K, Bik HM, Mächler E, Seymour M, Lacoursière-Roussel A, Altermatt F, Creer S, Bista I, Lodge DM,  
495 de Vere N, Pfrender ME, Bernatchez L (2017) Environmental DNA metabarcoding: Transforming  
496 how we survey animal and plant communities. *Molecular Ecology* 26: 5872–5895.  
497 <https://doi.org/10.1111/mec.14350>
- 498 Delrieu-Trottin E, Williams JT, Pitassy D, Driskell A, Hubert N, Viviani J, Cribb TH, Espiau B, Galzin R,  
499 Kulbicki M, Lison de Loma T, Meyer C, Mourier J, Mou-Tham G, Parravicini V, Plantard P, Sasal P, Siu  
500 G, Tolou N, Veuille M, Weigt L, Planes S (2019) A DNA barcode reference library of French  
501 Polynesian shore fishes. *Scientific Data* 6: 1–8. <https://doi.org/10.1038/s41597-019-0123-5>
- 502 Fontes JT, Vieira PE, Ekrem T, Soares P, Costa FO (2021) BAGS: An automated Barcode, Audit & Grade  
503 System for DNA barcode reference libraries. *Molecular Ecology Resources* 21: 573–583.  
504 <https://doi.org/10.1111/1755-0998.13262>
- 505 Fraija-Fernández N, Bouquieaux MC, Rey A, Mendibil I, Cotano U, Irigoien X, Santos M, Rodríguez-  
506 Ezpeleta N (2020) Marine water environmental DNA metabarcoding provides a comprehensive fish  
507 diversity assessment and reveals spatial patterns in a large oceanic area. *Ecology and Evolution* 10:  
508 7560–7584. <https://doi.org/10.1002/ece3.6482>
- 509 Gilbey J, Carvalho G, Castilho R, Coscia I, Coulson MW, Dahle G, Derycke S, Francisco SM, Helyar SJ,  
510 Johansen T, Junge C, Layton KKS, Martinsohn J, Matejusova I, Robalo JI, Rodríguez-Ezpeleta N, Silva  
511 G, Strammer I, Vasemägi A, Volckaert FAM (2021) Life in a drop: Sampling environmental DNA for  
512 marine fishery management and ecosystem monitoring. *Marine Policy* 124.  
513 <https://doi.org/10.1016/j.marpol.2020.104331>
- 514 Gold Z, Curd EE, Goodwin KD, Choi ES, Frable BW, Thompson AR, Walker HJ, Burton RS, Kacev D, Martz  
515 LD, Barber PH (2021) Improving metabarcoding taxonomic assignment: A case study of fishes in a  
516 large marine ecosystem. *Molecular Ecology Resources* 21: 2546–2564.  
517 <https://doi.org/10.1111/1755-0998.13450>
- 518 Hänfling B, Lawson Handley L, Read DS, Hahn C, Li J, Nichols P, Blackman RC, Oliver A, Winfield IJ (2016)  
519 Environmental DNA metabarcoding of lake fish communities reflects long-term data from  
520 established survey methods. *Molecular Ecology* 25: 3101–3119.  
521 <https://doi.org/10.1111/mec.13660>

- 522 Hering D, Borja A, Jones JI, Pont D, Boets P, Bouchez A, Bruce K, Drakare S, Hänfling B, Kahlert M, Leese F,  
523 Meissner K, Mergen P, Reyjol Y, Segurado P, Vogler A, Kelly M (2018) Implementation options for  
524 DNA-based identification into ecological status assessment under the European Water Framework  
525 Directive. *Water Research* 138: 192–205. <https://doi.org/10.1016/j.watres.2018.03.003>
- 526 Hleap JS, Littlefair JE, Steinke D, Hebert PDN, Cristescu ME (2021) Assessment of current taxonomic  
527 assignment strategies for metabarcoding eukaryotes. *Molecular Ecology Resources* 21: 2190–2203.  
528 <https://doi.org/10.1111/1755-0998.13407>
- 529 Jazdzewska AM, Tandberg AHS, Horton T, Brix S (2021) Global gap-analysis of amphipod barcode library.  
530 *PeerJ* 9: 1–28. <https://doi.org/10.7717/peerj.12352>
- 531 Klymus KE, Marshall NT, Stepien CA (2017) Environmental DNA (eDNA) metabarcoding assays to detect  
532 invasive invertebrate species in the Great Lakes. *PLoS ONE* 12: 1–24.  
533 <https://doi.org/10.1371/journal.pone.0177643>
- 534 Knebelsberger T, Landi M, Neumann H, Kloppmann M, Sell AF, Campbell PD, Laakmann S, Raupach MJ,  
535 Carvalho GR, Costa FO (2014) A reliable DNA barcode reference library for the identification of the  
536 North European shelf fish fauna. *Molecular Ecology Resources* 14: 1060–1071.  
537 <https://doi.org/10.1111/1755-0998.12238>
- 538 Layton KKS, Corstorphine EA, Hebert PDN (2016) Exploring canadian echinoderm diversity through DNA  
539 barcodes. *PLoS ONE* 11: 1–16. <https://doi.org/10.1371/journal.pone.0166118>
- 540 Leite BR, Vieira PE, Troncoso JS, Costa FO (2021) Comparing species detection success between  
541 molecular markers in DNA metabarcoding of coastal macroinvertebrates. *Metabarcoding and*  
542 *Metagenomics* 5: 249–260. <https://doi.org/10.3897/MBMG.5.70063>
- 543 Leray M, Knowlton N, Ho SL, Nguyen BN, Machida RJ (2019) GenBank is a reliable resource for 21st  
544 century biodiversity research. *Proceedings of the National Academy of Sciences of the United States*  
545 *of America* 116: 22651–22656. <https://doi.org/10.1073/pnas.1911714116>
- 546 Locatelli NS, McIntyre PB, Therkildsen NO, Baetscher DS (2020) GenBank’s reliability is uncertain for  
547 biodiversity researchers seeking species-level assignment for eDNA. *Proceedings of the National*  
548 *Academy of Sciences of the United States of America* 117: 32211–32212.  
549 <https://doi.org/10.1073/pnas.2007421117>
- 550 Makiola A, Compson ZG, Baird DJ, Barnes MA, Boerlijst SP, Bouchez A, Brennan G, Bush A, Canard E,  
551 Cordier T, Creer S, Curry RA, David P, Dumbrell AJ, Gravel D, Hajibabaei M, Hayden B, van der Hoorn  
552 B, Jarne P, Jones JI, Karimi B, Keck F, Kelly M, Knot IE, Krol L, Massol F, Monk WA, Murphy J,  
553 Pawlowski J, Poisot T, Porter TM, Randall KC, Ransome E, Ravigné V, Raybould A, Robin S, Schrama  
554 M, Schatz B, Tamaddoni-Nezhad A, Trimbos KB, Vacher C, Vasselon V, Wood S, Woodward G, Bohan  
555 DA (2020) Key questions for next-generation biomonitoring. *Frontiers in Environmental Science* 7:  
556 1–14. <https://doi.org/10.3389/fenvs.2019.00197>
- 557 Marques V, Milhau T, Albouy C, Dejean T, Manel S, Mouillot D, Juhel J-B (2021) GAPeDNA: Assessing and  
558 mapping global species gaps in genetic databases for metabarcoding studies. *Diversity and*

- 559 distribution 27: 1880–1892. <https://doi.org/10.3897/aca.4.e64884>
- 560 Mathon L, Valentini A, Guérin PE, Normandeau E, Noel C, Lionnet C, Boulanger E, Thuiller W, Bernatchez  
561 L, Mouillot D, Dejean T, Manel S (2021) Benchmarking bioinformatic tools for fast and accurate  
562 eDNA metabarcoding species identification. *Molecular Ecology Resources* 21: 2565–2579.  
563 <https://doi.org/10.1111/1755-0998.13430>
- 564 McCusker MR, Denti D, Guelpen L, Kenchington E, Bentzen P (2013) Barcoding Atlantic Canada’s  
565 commonly encountered marine fishes. *Molecular Ecology Resources* 13: 177–188.  
566 <https://doi.org/10.1111/1755-0998.12043>
- 567 McGee KM, Robinson C V., Hajibabaei M (2019) Gaps in DNA-Based Biomonitoring Across the Globe.  
568 *Frontiers in Ecology and Evolution* 7: 1–7. <https://doi.org/10.3389/fevo.2019.00337>
- 569 Meiklejohn KA, Damaso N, Robertson JM (2019) Assessment of BOLD and GenBank – Their accuracy and  
570 reliability for the identification of biological materials. *PLoS ONE* 14: 1–14.  
571 <https://doi.org/10.1371/journal.pone.0217084>
- 572 Mioduchowska M, Czyż MJ, Gołdyn B, Kur J, Sell J (2018) Instances of erroneous DNA barcoding of  
573 metazoan invertebrates: Are universal cox1 gene primers too “universal”? Hajibabaei M (Ed.). *PLOS*  
574 *ONE* 13: e0199609. <https://doi.org/10.1371/journal.pone.0199609>
- 575 Murali A, Bhargava A, Wright ES (2018) IDTAXA: a novel approach for accurate taxonomic classification of  
576 microbiome sequences. *Microbiome* 6: 140. <https://doi.org/10.1186/s40168-018-0521-5>
- 577 Nozères C (2017) Preliminary checklist of marine animal species of the Gulf of St. Lawrence, Canada,  
578 based on 4 sources. <https://doi.org/10.13140/RG.2.2.10056.62727>
- 579 O’Rourke DR, Bokulich NA, Jusino MA, MacManes MD, Foster JT (2020) A total crapshoot? Evaluating  
580 bioinformatic decisions in animal diet metabarcoding analyses. *Ecology and Evolution* 10: 9721–  
581 9739. <https://doi.org/10.1002/ece3.6594>
- 582 Oliveira LM, Kneibelsberger T, Landi M, Soares P, Raupach MJ, Costa FO (2016) Assembling and auditing a  
583 comprehensive DNA barcode reference library for European marine fishes. *Journal of Fish Biology*  
584 89: 2741–2754. <https://doi.org/10.1111/jfb.13169>
- 585 Pappalardo P, Collins AG, Pagenkopp Lohan KM, Hanson KM, Truskey SB, Jaeckle W, Ames CL, Goodheart  
586 JA, Bush SL, Biancani LM, Strong EE, Vecchione M, Harasewych MG, Reed K, Lin C, Hartil EC,  
587 Whelpley J, Blumberg J, Matterson K, Redmond NE, Becker A, Boyle MJ, Osborn KJ (2021) The role  
588 of taxonomic expertise in interpretation of metabarcoding studies. *ICES Journal of Marine Science*  
589 78: 3397–3410. <https://doi.org/10.1093/icesjms/fsab082>
- 590 Piper AM, Batovska J, Cogan NOI, Weiss J, Cunningham JP, Rodoni BC, Blacket MJ (2019) Prospects and  
591 challenges of implementing DNA metabarcoding for high-throughput insect surveillance.  
592 *GigaScience* 8: 1–22. <https://doi.org/10.1093/gigascience/giz092>
- 593 Porter TM, Hajibabaei M (2018a) Automated high throughput animal CO1 metabarcoding classification.

- 594 Scientific Reports 8: 1–10. <https://doi.org/10.1038/s41598-018-22505-4>
- 595 Porter TM, Hajibabaei M (2018b) Over 2.5 million COI sequences in GenBank and growing. Arthofer W  
596 (Ed.). PLOS ONE 13: e0200177. <https://doi.org/10.1371/journal.pone.0200177>
- 597 Porter TM, Hajibabaei M (2020) Putting COI Metabarcoding in Context: The Utility of Exact Sequence  
598 Variants (ESVs) in Biodiversity Analysis. *Frontiers in Ecology and Evolution* 8: 1–15.  
599 <https://doi.org/10.3389/fevo.2020.00248>
- 600 Radulovici AE, Vieira PE, Duarte S, Teixeira MAL, Borges LMS, Deagle BE, Majaneva S, Redmond N, Schultz  
601 JA, Costa FO (2021) Revision and annotation of DNA barcode records for marine invertebrates:  
602 report of the 8th iBOL conference hackathon. *Metabarcoding and Metagenomics* 5: 207–217.  
603 <https://doi.org/10.3897/mbmg.5.67862>
- 604 Radulovici AE, Sainte-Marie B, Dufresne F (2009) DNA barcoding of marine crustaceans from the Estuary  
605 and Gulf of St Lawrence: A regional-scale approach. *Molecular Ecology Resources* 9: 181–187.  
606 <https://doi.org/10.1111/j.1755-0998.2009.02643.x>
- 607 Ramirez JL, Rosas-Puchuri U, Cañedo RM, Alfaro-Shigueto J, Ayon P, Zelada-Mázmela E, Siccha-Ramirez R,  
608 Velez-Zuazo X (2020) DNA barcoding in the Southeast Pacific marine realm: Low coverage and  
609 geographic representation despite high diversity. *PLoS ONE* 15: 1–13.  
610 <https://doi.org/10.1371/journal.pone.0244323>
- 611 Ratnasingham S, Hebert PDN (2007) BOLD: The Barcode of Life Data System: Barcoding. *Molecular  
612 Ecology Notes* 7: 355–364. <https://doi.org/10.1111/j.1471-8286.2007.01678.x>
- 613 Ratnasingham S, Hebert PDN (2013) A DNA-based registry for all animal species: The Barcode Index  
614 Number (BIN) system. *PLoS ONE* 8. <https://doi.org/10.1371/journal.pone.0066213>
- 615 Richardson RT, Bengtsson-Palme J, Johnson RM (2017) Evaluating and optimizing the performance of  
616 software commonly used for the taxonomic classification of DNA metabarcoding sequence data.  
617 *Molecular Ecology Resources* 17: 760–769. <https://doi.org/10.1111/1755-0998.12628>
- 618 Schenekar T, Schletterer M, Lecaudey LA, Weiss SJ (2020) Reference databases, primer choice, and assay  
619 sensitivity for environmental metabarcoding: Lessons learnt from a re-evaluation of an eDNA fish  
620 assessment in the Volga headwaters. *River Research and Applications* 36: 1004–1013.  
621 <https://doi.org/10.1002/rra.3610>
- 622 Stoeckle MY, Soboleva L, Charlop-Powers Z (2017) Aquatic environmental DNA detects seasonal fish  
623 abundance and habitat preference in an urban estuary. *PLoS ONE* 12: 1–15.  
624 <https://doi.org/10.1371/journal.pone.0175186>
- 625 Stoeckle MY, Das Mishu M, Charlop-Powers Z (2020) Improved environmental DNA reference library  
626 detects overlooked marine fishes in New Jersey, United States. *Frontiers in Marine Science* 7.  
627 <https://doi.org/10.3389/fmars.2020.00226>
- 628 Taberlet P, Coissac E, Pompanon F, Brochmann C, Willerslev E (2012) Towards next-generation

- 629 biodiversity assessment using DNA metabarcoding. *Molecular Ecology* 21: 2045–2050.  
630 <https://doi.org/10.1111/j.1365-294X.2012.05470.x>
- 631 Wang Q, Garrity GM, Tiedje JM, Cole JR (2007) Naïve Bayesian classifier for rapid assignment of rRNA  
632 sequences into the new bacterial taxonomy. *Applied and Environmental Microbiology* 73: 5261–  
633 5267. <https://doi.org/10.1128/AEM.00062-07>
- 634 Weigand H, Beermann AJ, Čiampor F, Costa FO, Csabai Z, Duarte S, Geiger MF, Grabowski M, Rimet F,  
635 Rulik B, Strand M, Szucsich N, Weigand AM, Willassen E, Wyler SA, Bouchez A, Borja A, Čiamporová-  
636 Zaťovičová Z, Ferreira S, Dijkstra K-DB, Eisendle U, Freyhof J, Gadawski P, Graf W, Haegerbaeumer  
637 A, van der Hoorn BB, Japoshvili B, Keresztes L, Keskin E, Leese F, Macher JN, Mamos T, Paz G, Pešić  
638 V, Pfannkuchen DM, Pfannkuchen MA, Price BW, Rinkevich B, Teixeira MAL, Várбірó G, Ekrem T  
639 (2019) DNA barcode reference libraries for the monitoring of aquatic biota in Europe: Gap-analysis  
640 and recommendations for future work. *Science of The Total Environment* 678: 499–524.  
641 <https://doi.org/10.1016/j.scitotenv.2019.04.247>
- 642 WoRMS Editorial Board (2020) World Register of Marine Species. <https://doi.org/10.14284/170>
- 643 Wright ES (2016) Using DECIPHER v2.0 to analyze big biological sequence data in R. *R Journal* 8: 352–359.  
644 <https://doi.org/10.32614/rj-2016-025>
- 645 Xiong F, Shu L, Zeng H, Gan X, He S, Peng Z (2022) Methodology for fish biodiversity monitoring with  
646 environmental DNA metabarcoding: The primers, databases and bioinformatic pipelines. *Water*  
647 *Biology and Security* 1: 100007. <https://doi.org/10.1016/j.watbs.2022.100007>
- 648 Yu DW, Ji Y, Emerson BC, Wang X, Ye C, Yang C, Ding Z (2012) Biodiversity soup: Metabarcoding of  
649 arthropods for rapid biodiversity assessment and biomonitoring. *Methods in Ecology and Evolution*  
650 3: 613–623. <https://doi.org/10.1111/j.2041-210X.2012.00198.x>
- 651 Zafeiropoulos H, Gargan L, Hintikka S, Pavloudi C, Carlsson J (2021) The Dark mAtteR iNvestigator (DARN)  
652 tool: Getting to know the known unknowns in COI amplicon data. *Metabarcoding and*  
653 *Metagenomics* 5: 163–174. <https://doi.org/10.3897/MBMG.5.69657>
- 654
- 655

656 Data Accessibility

657 The data and scripts used in this manuscript are stored in the github repository

658 [https://github.com/GenomicsMLI-DFO/GSL\\_COI\\_ref\\_library](https://github.com/GenomicsMLI-DFO/GSL_COI_ref_library)

659 The GSL-rl (sequences, reliability ranking and trained dataset) can be found in the github repository

660 [https://github.com/GenomicsMLI-DFO/MLI\\_GSL-rl](https://github.com/GenomicsMLI-DFO/MLI_GSL-rl)

661 Benefit-Sharing

662 Benefits from this research accrue from the sharing of our data and results on public databases as  
663 described above.

664

665 Author Contributions

666 A.B. co-conceived and co-developed the ideas underlying the manuscript, wrote scripts, compiled GSL-rl,  
667 analyzed data, and co-wrote the manuscript. C.N. initiated the project of a reference library for the GSL,  
668 co-conceived and co-developed the ideas, revised GSL-rl, analyzed data and edited all drafts. E.P.  
669 initiated the project of a reference library for the GSL and revised the manuscript. G.J.P. co-conceived  
670 and co-developed the ideas, co-wrote the manuscript and secured funding.

671

672

673 Figure legends

674

675 **Figure 1.** Schematic representation of the two sources of reference sequences used and compared in this  
676 study and their associated methods, A) the public repository NCBI nucleotide database (NCBI-nt), and B)  
677 the newly created regional library for metazoans from the Gulf of St. Lawrence (GSL-rl). Using NCBI-nt,  
678 exact sequence variants (ESVs) were assigned using the BlastX tool *blastn* (hereafter Blast; Camacho et  
679 al. 2009). Assignment results were filtered based on taxonomic identity, then a least common ancestor  
680 (LCA) or a TopHit method was used to assign a unique taxon identity to each ESV. The creation of GSL-rl  
681 involved data mining of the public repository BOLD and included multiple filtering and auditing steps and  
682 a feedback loop to improve it. Taxonomic assignments of ESV were performed with Blast or with the  
683 classifier IDtaxa (Murali et al. 2018). For GSL-rl, the species ranking was based on sequence availability  
684 and sequence similarity to closely related species in the Gulf of St. Lawrence. For NCBI-nt, the species  
685 ranking involved a plausibility filter based on the location (see methods for more details).

686 **Figure 2.** Classification of 651 marine faunal species previously observed in the Gulf of St. Lawrence and  
687 included in the GSL-rl, by phylum. Species reliability ranking is based on the availability from local species  
688 and sequence similarity to closely related species in the Gulf of St. Lawrence.

689 **Figure 3.** Results of taxonomic assignment of sequences from the GSL-rl using NCBI-nt and Blast-LCA or  
690 Blast-TopHit methods. Panels A and B present the proportions of accurate and inaccurate species  
691 assignments. Results are presented for all taxonomic groups at the three identity thresholds (95%, 97%,  
692 99%; panel A) and by taxonomic group at the 97% threshold (panel B).

693 **Figure 4.** Assignment results at the species level using a regional library (GSL-rl) or a public repository  
694 (NCBI-nt), and popular assignment methods. We used three assignment methods, namely IDtaxa  
695 (confidence levels: 40%, 50% and 60%), Blast-LCA, and Blast-TopHit (identity thresholds: 95%, 97% and  
696 99%). Panel A detailed the detections for each species, and panel B synthesize the number of species  
697 assignments for each source of reference sequences and method. Panel C compared the species rank for  
698 all the species assigned with the two sources. Species rank categories are based on sequence availability  
699 and sequence similarity to closely related species in the Gulf of St. Lawrence for GSL-rl and on the  
700 geographic plausibility for NCBI-nt.

701

702

703 Figures

704

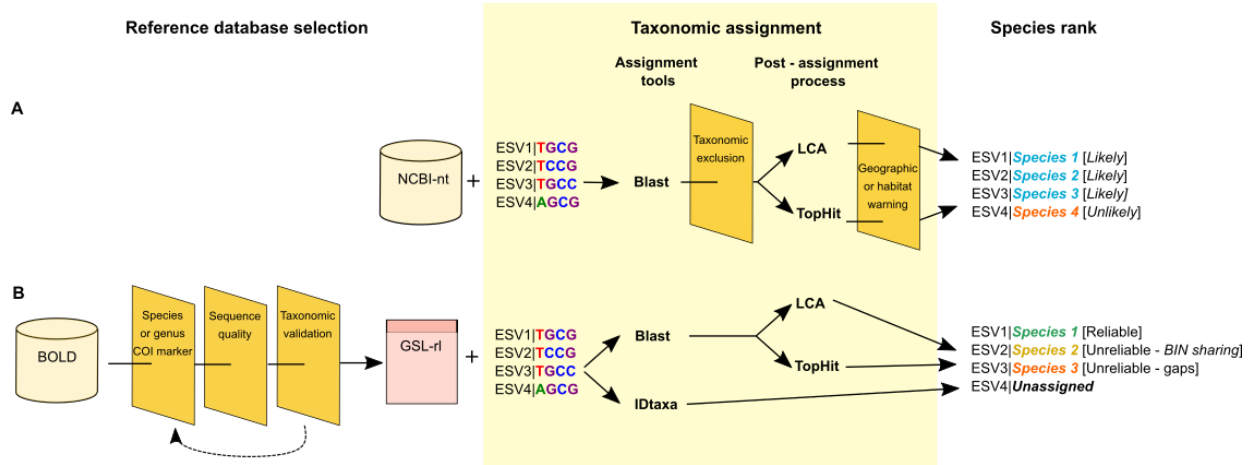

705

706 Fig. 1

707



708

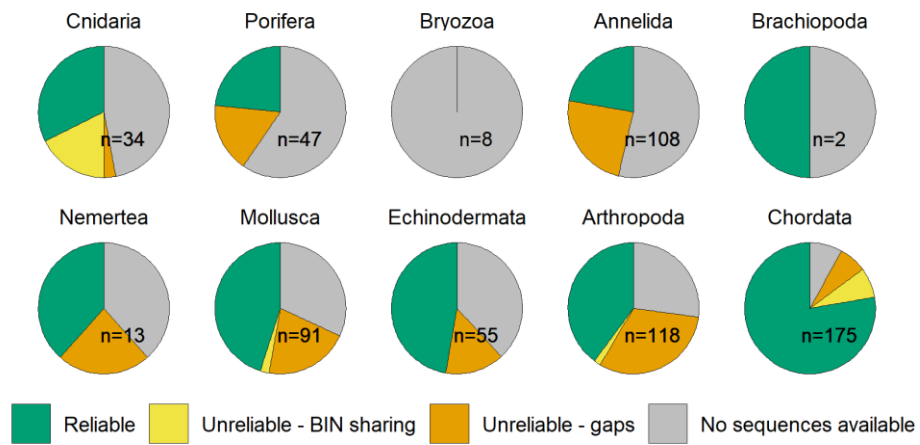

709

710 Fig. 2

711

712

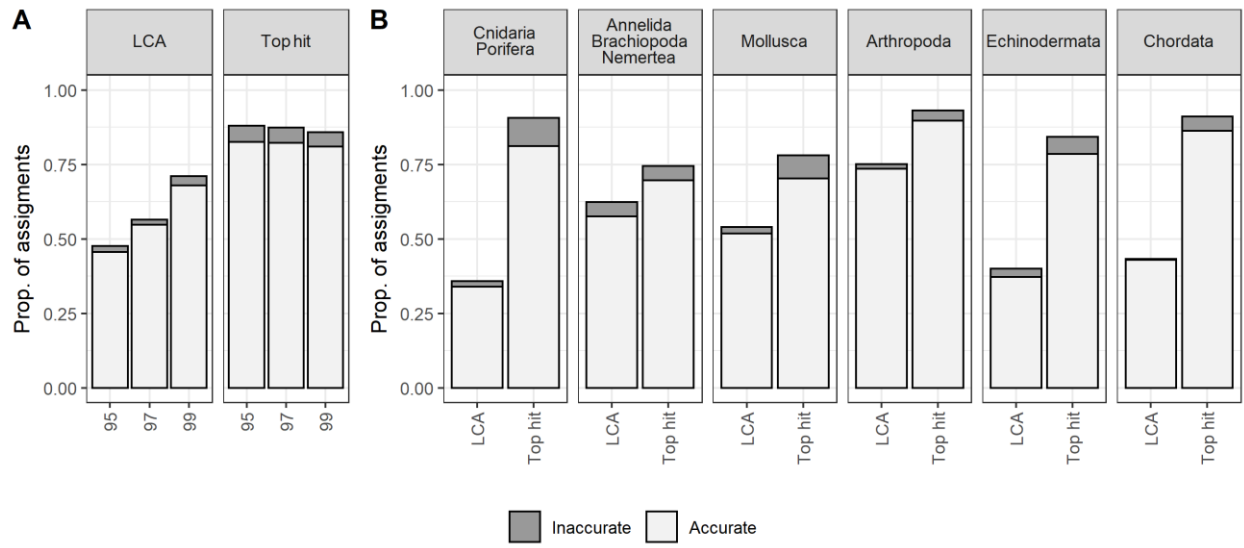

713

714

715 Fig. 3

716

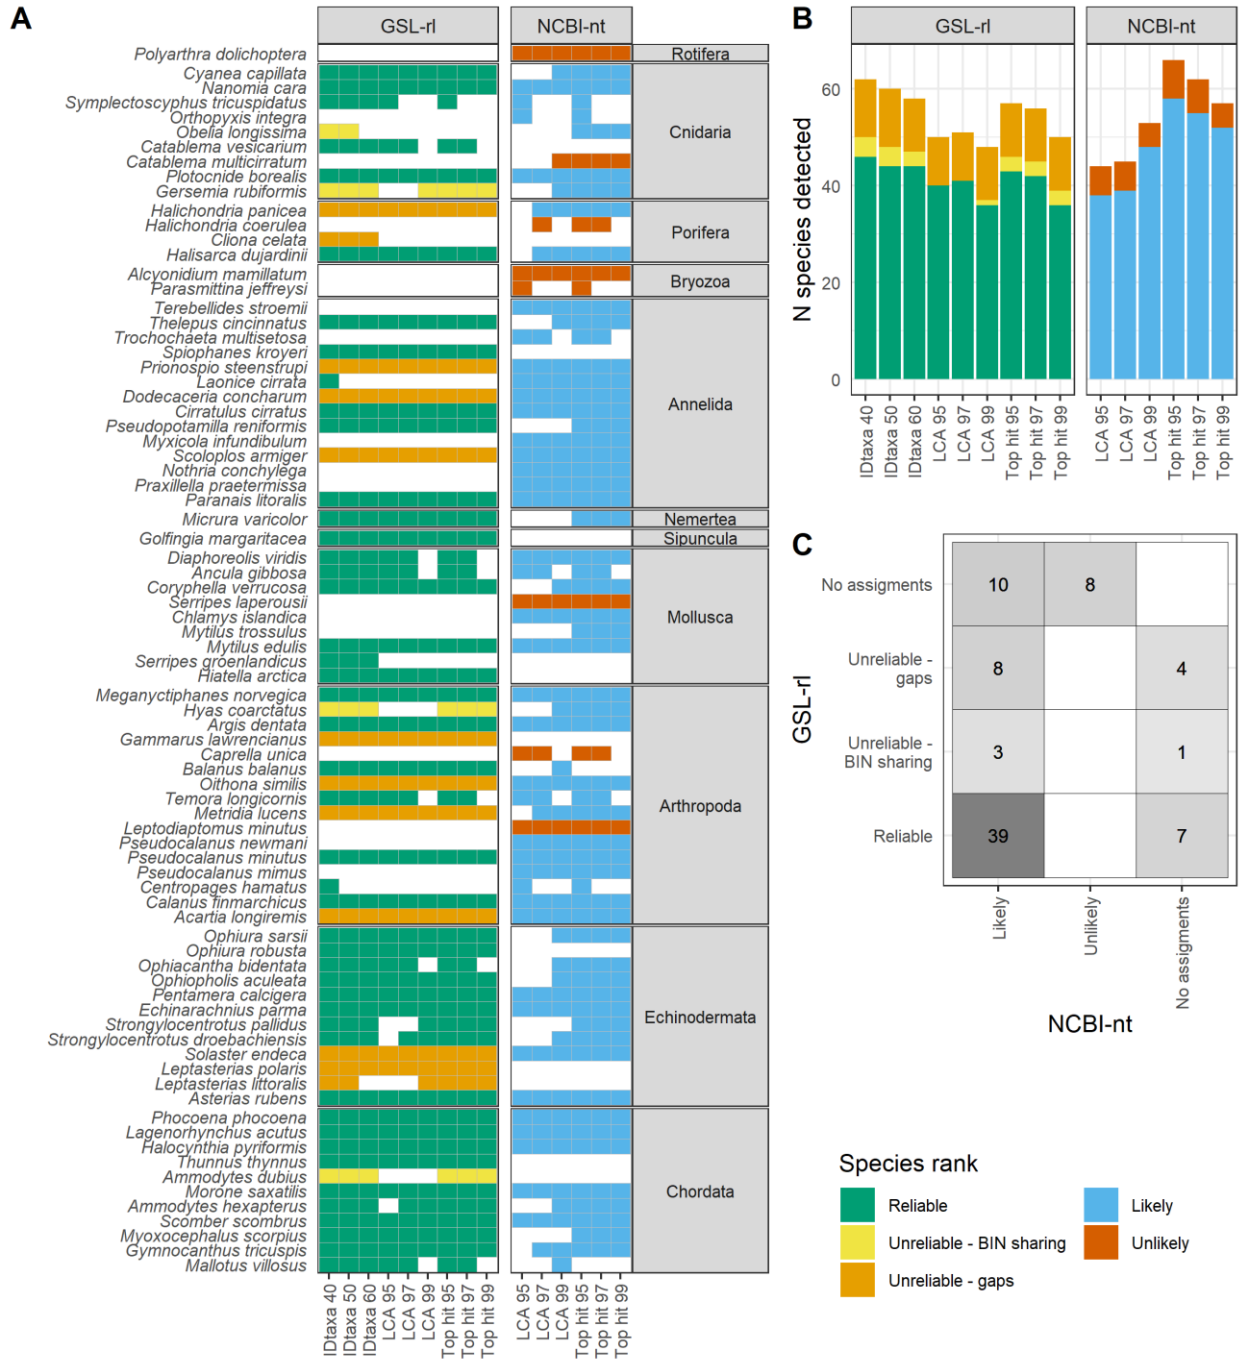

717

718 Fig. 4

719
